# Supplementary material for: Serum Uric Acid Levels in Parkinson’s Disease: A Cross-Sectional Electronic Medical Record Database Study from a Tertiary Referral Centre in Romania
Source: MDPI journal article supplement (doi:10.3390/medicina58020245), 2022-02-06
Supplement: s1 [file s1]

**Supplementary Table S1.** Spreadsheet of the Parkinson`s disease patients included in the study - demographic data, presence of motor complications, symptomatic treatment

| Patient no. | Sex | Age (years) | PD duration | Age at onset | Motor complications | Levodopa | DA  | IMAO | COMT inhibitors | LEDD (mg) | Psychiatric medication |
|-------------|-----|-------------|-------------|--------------|---------------------|----------|-----|------|-----------------|-----------|------------------------|
| 1           | M   | 60          | 9           | 51           | no                  | yes      | yes | yes  | no              | 204       | no                     |
| 2           | M   | 65          | 4           | 61           | no                  | no       | yes | yes  | no              | 160       | no                     |
| 3           | F   | 71          | 3           | 68           | no                  | yes      | no  | yes  | no              | 475       | no                     |
| 4           | M   | 67          | 15          | 52           | yes                 | yes      | no  | yes  | no              | 2095      | yes                    |
| 5           | M   | 66          | 14          | 52           | no                  | yes      | no  | yes  | yes             | 1023      | yes                    |
| 6           | F   | 70          | 3           | 67           | no                  | yes      | yes | yes  | no              | 529       | no                     |
| 7           | M   | 71          | 5           | 66           | no                  | no       | yes | yes  | no              | 310       | no                     |
| 8           | F   | 67          | 2           | 65           | no                  | yes      | no  | yes  | no              | 850       | no                     |
| 9           | M   | 56          | 4           | 52           | no                  | no       | yes | yes  | no              | 120       | no                     |
| 10          | M   | 60          | 1           | 59           | no                  | yes      | yes | no   | no              | 1157      | no                     |
| 11          | M   | 60          | 0           | 60           | no                  | yes      | yes | yes  | no              | 515       | no                     |
| 12          | F   | 74          | 4           | 70           | no                  | yes      | no  | yes  | no              | 350       | yes                    |
| 13          | M   | 60          | 4           | 56           | no                  | yes      | yes | yes  | no              | 1079      | yes                    |
| 14          | M   | 78          | NA          | NA           | no                  | yes      | no  | no   | no              | 475       | yes                    |
| 15          | M   | 56          | NA          | NA           | no                  | yes      | yes | yes  | no              | 1170      | yes                    |
| 16          | M   | 72          | 1           | 71           | no                  | yes      | no  | no   | no              | 375       | no                     |
| 17          | M   | 63          | 13          | 50           | yes                 | yes*     | no  | no   | no              | 839       | yes                    |
| 18          | M   | 65          | 1           | 64           | no                  | no       | yes | yes  | no              | 120       | no                     |
| 19          | M   | 69          | 11          | 58           | yes                 | yes      | yes | no   | yes             | 1378      | yes                    |
| 20          | F   | 87          | NA          | NA           | no                  | yes      | no  | no   | no              | 375       | no                     |
| 21          | M   | 69          | 2           | 67           | no                  | no       | yes | yes  | no              | 180       | no                     |
| 22          | F   | 67          | NA          | NA           | yes                 | yes*     | no  | no   | no              | 2593      | yes                    |
| 23          | F   | 71          | NA          | NA           | yes                 | yes      | no  | yes  | yes             | 726       | yes                    |
| 24          | F   | 63          | NA          | NA           | yes                 | yes      | yes | yes  | yes             | 2008      | yes                    |
| 25          | F   | 62          | NA          | NA           | yes                 | yes      | yes | yes  | yes             | 1679      | yes                    |
| 26          | M   | 66          | NA          | NA           | no                  | yes      | no  | no   | no              | 250       | no                     |
| 27          | M   | 74          | 4           | 70           | yes                 | yes      | yes | yes  | yes             | 1014      | no                     |
| 28          | M   | 55          | 0           | 55           | no                  | yes      | no  | yes  | no              | 725       | yes                    |
| 29          | M   | 85          | 5           | 80           | no                  | yes      | yes | yes  | no              | 1610      | yes                    |
| 30          | M   | 74          | NA          | NA           | no                  | yes      | no  | yes  | no              | 1100      | no                     |
| 31          | M   | 54          | 4           | 50           | yes                 | yes      | yes | yes  | no              | 1545      | no                     |
| 32          | M   | 83          | NA          | NA           | no                  | yes      | no  | yes  | no              | 1100      | yes                    |
| 33          | F   | 70          | 6           | 64           | yes                 | yes*     | no  | no   | no              | 1242      | yes                    |
| 34          | M   | 79          | NA          | NA           | no                  | yes      | yes | no   | yes             | 1570      | yes                    |
| 35          | M   | 67          | NA          | NA           | no                  | yes      | yes | yes  | no              | 670       | yes                    |
| 36          | F   | 76          | NA          | NA           | yes                 | yes      | no  | yes  | yes             | 1348      | yes                    |
| 37          | M   | 81          | 2           | 79           | no                  | yes      | no  | no   | no              | 250       | yes                    |
| 38          | F   | 70          | 10          | 60           | yes                 | yes      | yes | yes  | yes             | 1398      | yes                    |
| 39          | M   | 73          | 23          | 50           | yes                 | yes*     | no  | yes  | no              | 968       | yes                    |
| 40          | F   | 80          | NA          | NA           | no                  | yes      | no  | yes  | no              | 600       | yes                    |
| 41          | F   | 74          | 7           | 67           | yes                 | yes      | yes | no   | yes             | 1864      | no                     |
| 42          | F   | 80          | 1           | 79           | no                  | yes      | no  | yes  | no              | 850       | no                     |
| 43          | M   | 75          | 2           | 73           | no                  | yes      | no  | no   | no              | 500       | no                     |
| 44          | M   | 79          | 4           | 75           | NA                  | NA       | NA  | NA   | NA              | NA        | NA                     |
| 45          | M   | 78          | NA          | NA           | NA                  | NA       | NA  | NA   | NA              | NA        | NA                     |
| 46          | M   | 51          | 1           | 50           | no                  | NA       | NA  | NA   | NA              | NA        | NA                     |
| 47          | M   | 67          | NA          | NA           | NA                  | NA       | NA  | NA   | NA              | NA        | NA                     |
| 48          | M   | 54          | 4           | 50           | yes                 | yes      | yes | yes  | no              | 1545      | no                     |
| 49          | M   | 70          | 1           | 69           | NA                  | NA       | NA  | NA   | NA              | NA        | NA                     |

(COMT = catechol O-methyl transferase; DA = dopamine agonists; F = female; LEDD = levodopa equivalent daily dose; M = male; MAOI = monoaminoxidase inhibitors; NA = not available; \* = levodopa/carbidopa intestinal gel, included in the LEDD)

**Supplementary Table S2.** Spreadsheet of the Parkinson`s disease patients included in the study - Hoehn and Yahr stage, presence of cerebrovascular disease, cognitive impairment, and serum level of uric acid

| Patient no. | Hoehn and Yahr stage | Cerebrovascular disease | Cognitive impairment | Serum uric acid<br>(3.4-7 mg/dl) |
|-------------|----------------------|-------------------------|----------------------|----------------------------------|
| 1           | NA                   | yes                     | yes                  | 6.7                              |
| 2           | 3                    | NA                      | NA                   | 5.2                              |
| 3           | 2                    | yes                     | no                   | 6.4                              |
| 4           | 3                    | yes                     | yes                  | 3.3                              |
| 5           | 3                    | no                      | yes                  | 4.6                              |
| 6           | 3                    | no                      | no                   | 3.9                              |
| 7           | 1                    | no                      | no                   | 5.7                              |
| 8           | 2                    | NA                      | NA                   | 5.8                              |
| 9           | 2                    | no                      | no                   | 5.9                              |
| 10          | 2                    | no                      | no                   | 6.8                              |
| 11          | 2                    | NA                      | NA                   | 5.9                              |
| 12          | 2                    | NA                      | NA                   | 3.1                              |
| 13          | 2.5                  | NA                      | NA                   | 4.9                              |
| 14          | 2                    | yes                     | yes                  | 5.1                              |
| 15          | 2                    | no                      | no                   | 5.9                              |
| 16          | NA                   | NA                      | NA                   | 5.9                              |
| 17          | 4                    | no                      | yes                  | 4.1                              |
| 18          | 2                    | no                      | no                   | 5.9                              |
| 19          | 2                    | yes                     | yes                  | 5.6                              |
| 20          | NA                   | yes                     | no                   | 7.5                              |
| 21          | 2                    | no                      | no                   | 5.8                              |
| 22          | 4                    | no                      | yes                  | 4                                |
| 23          | 3                    | yes                     | yes                  | 3.9                              |
| 24          | 3                    | no                      | no                   | 3.3                              |
| 25          | 4                    | no                      | no                   | 4.1                              |
| 26          | NA                   | no                      | no                   | 4.3                              |
| 27          | 3                    | no                      | yes                  | 3.7                              |
| 28          | NA                   | no                      | no                   | 7.3                              |
| 29          | 2.5                  | NA                      | no                   | 6.5                              |
| 30          | NA                   | no                      | no                   | 5.7                              |
| 31          | 2                    | no                      | no                   | 6.9                              |
| 32          | 3                    | yes                     | yes                  | 4.9                              |
| 33          | NA                   | NA                      | yes                  | 3.2                              |
| 34          | NA                   | no                      | yes                  | 5.4                              |
| 35          | 3                    | no                      | no                   | 4.2                              |
| 36          | 3                    | no                      | no                   | 3.2                              |
| 37          | 2                    | yes                     | yes                  | 5.1                              |
| 38          | 3                    | no                      | no                   | 7.5                              |
| 39          | 4                    | no                      | yes                  | 3.6                              |
| 40          | 3                    | yes                     | yes                  | 2.7                              |
| 41          | 4                    | yes                     | no                   | 3.5                              |
| 42          | 2                    | yes                     | no                   | 3.5                              |
| 43          | 2                    | yes                     | no                   | 5.5                              |
| 44          | 3                    | no                      | yes                  | 4                                |
| 45          | NA                   | NA                      | NA                   | 5.3                              |
| 46          | 1                    | NA                      | NA                   | 3.9                              |
| 47          | 2                    | no                      | no                   | 4.3                              |
| 48          | 2                    | no                      | no                   | 5.3                              |
| 49          | NA                   | no                      | NA                   | 5.9                              |

(NA = not available)

**Supplementary Table S3.** Results of logistic regression analysing relationship between serum uric acid and the presence or absence of motor complications and cognitive impairment

| Dependent variable   | Unstandardized regression weight | P value | OR    | 95% CI for OR |       |
|----------------------|----------------------------------|---------|-------|---------------|-------|
|                      |                                  |         |       | Lower         | Upper |
| Motor complications  | - 0.595                          | 0.034   | 0.552 | 0.318         | 0.957 |
| Cognitive impairment | - 0.617                          | 0.028   | 0.539 | 0.310         | 0.957 |

(OR = odds ratio; CI = confidence interval)

**Supplementary Table S4.** Results of the Kolmogorov-Smirnov and Shapiro-Wilk tests performed to evaluate distribution of age and serum uric acid level, in SPSS® Statistics Subscription.

| Tests of Normality |                                 |    |       |              |    |      |
|--------------------|---------------------------------|----|-------|--------------|----|------|
|                    | Kolmogorov-Smirnov <sup>a</sup> |    |       | Shapiro-Wilk |    |      |
|                    | Statistic                       | df | Sig.  | Statistic    | df | Sig. |
| Age                | .059                            | 49 | .200* | .985         | 49 | .777 |
| Serum UA           | .115                            | 49 | .118  | .962         | 49 | .111 |

\*. This is a lower bound of the true significance.

a. Lilliefors Significance Correction; UA = uric acid

(UA = uric acid)

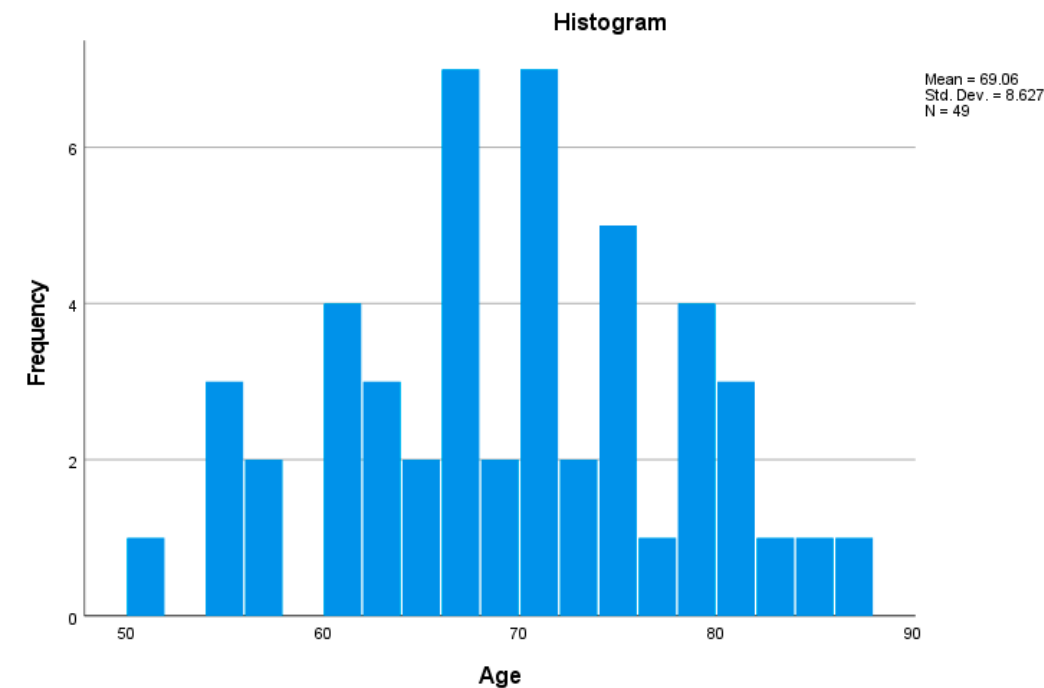

**Supplementary Figure S1.** Histogram showing normality of age for the included Parkinson’s disease patients, in SPSS® Subscription

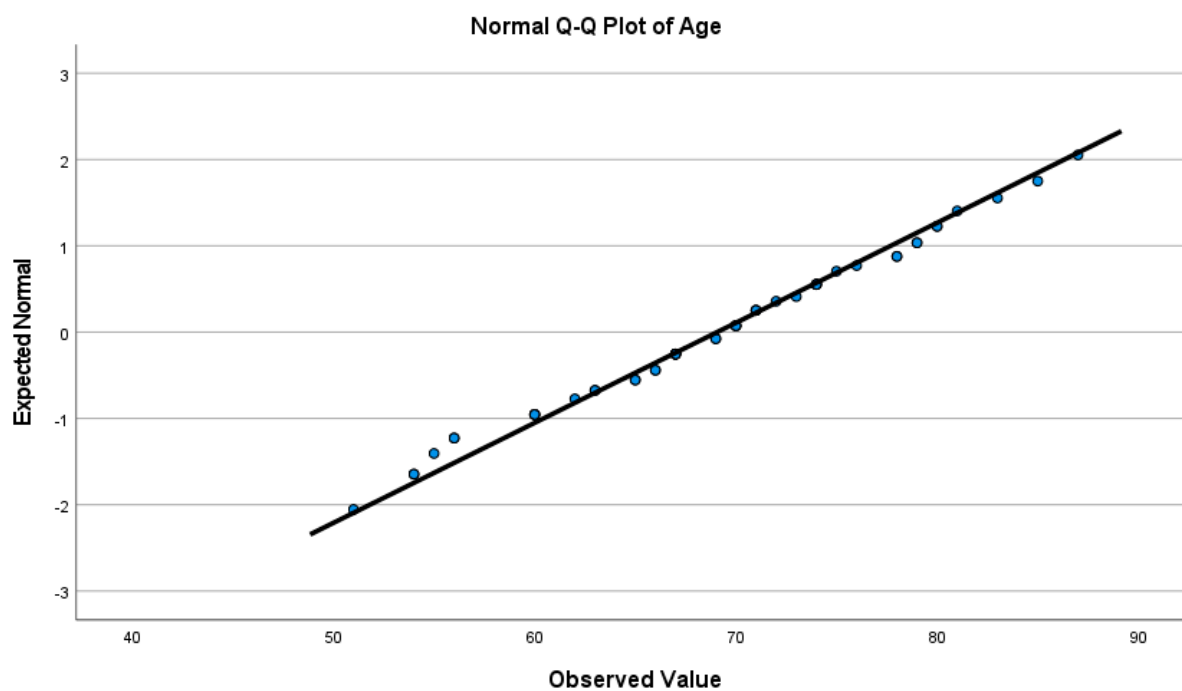

**Supplementary Figure S2.** Normal Q-Q plot showing normality of age for the included Parkinson's disease patients, in SPSS® Subscription

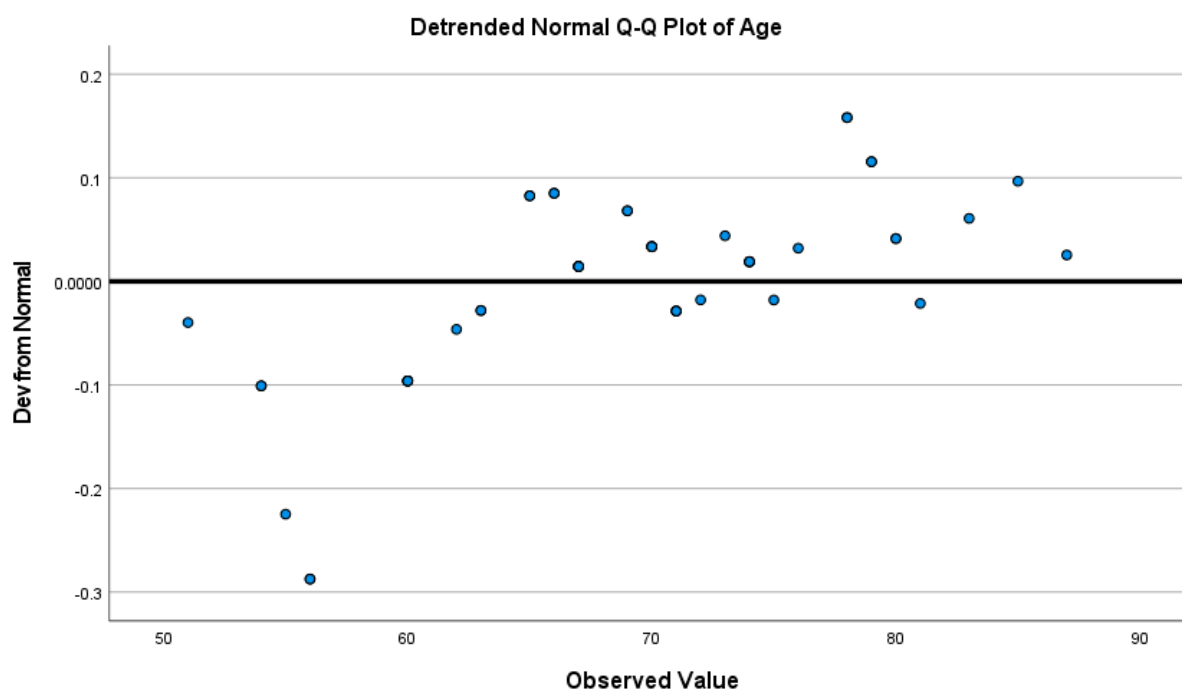

**Supplementary Figure S3.** Detrended normal Q-Q plot showing normality of age for the included Parkinson's disease patients, in SPSS® Subscription

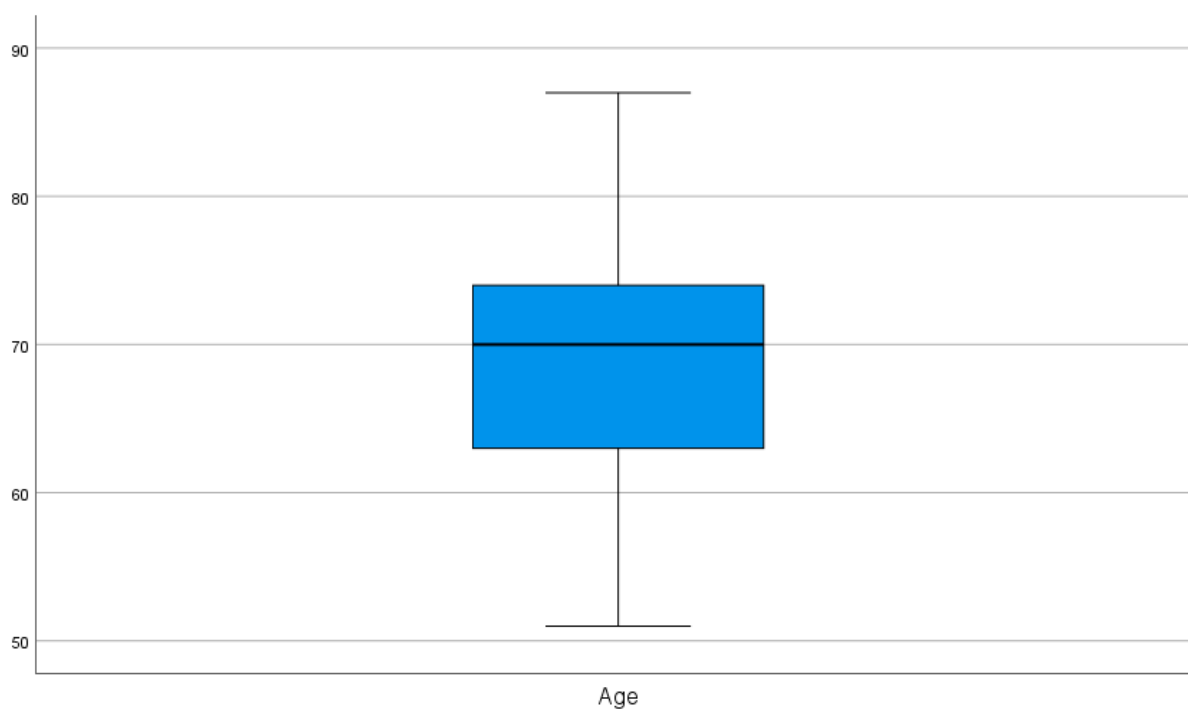

**Supplementary Figure S4.** Boxplot showing normality of age for the included Parkinson's disease patients, in SPSS® Subscription

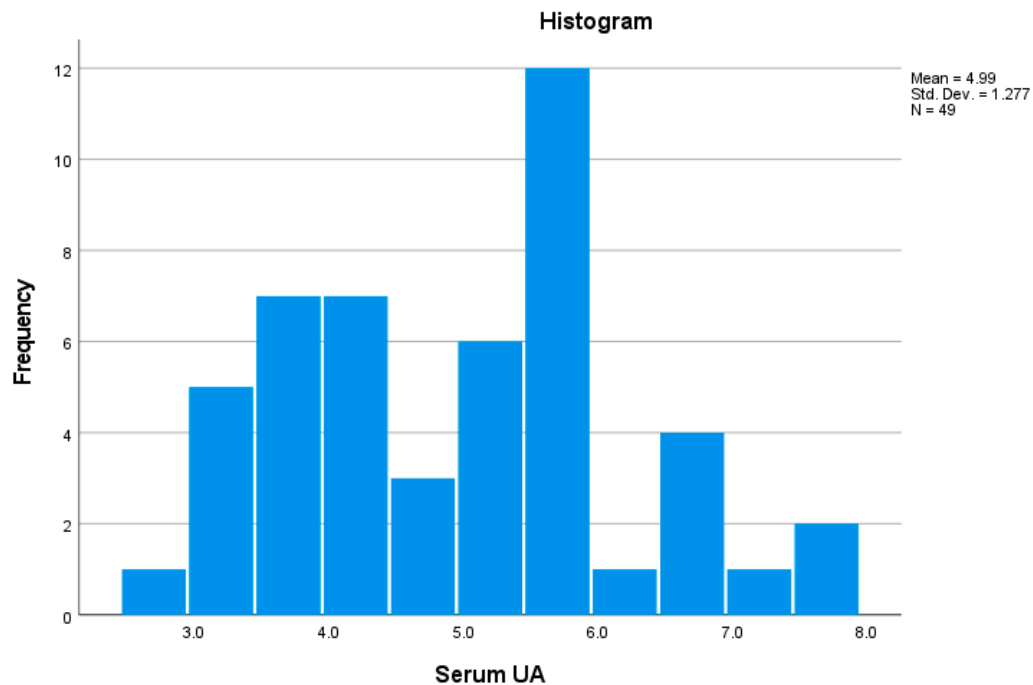

**Supplementary Figure S5.** Histogram showing normality of serum uric acid for the included Parkinson's disease patients, in SPSS® Subscription (UA = uric acid)

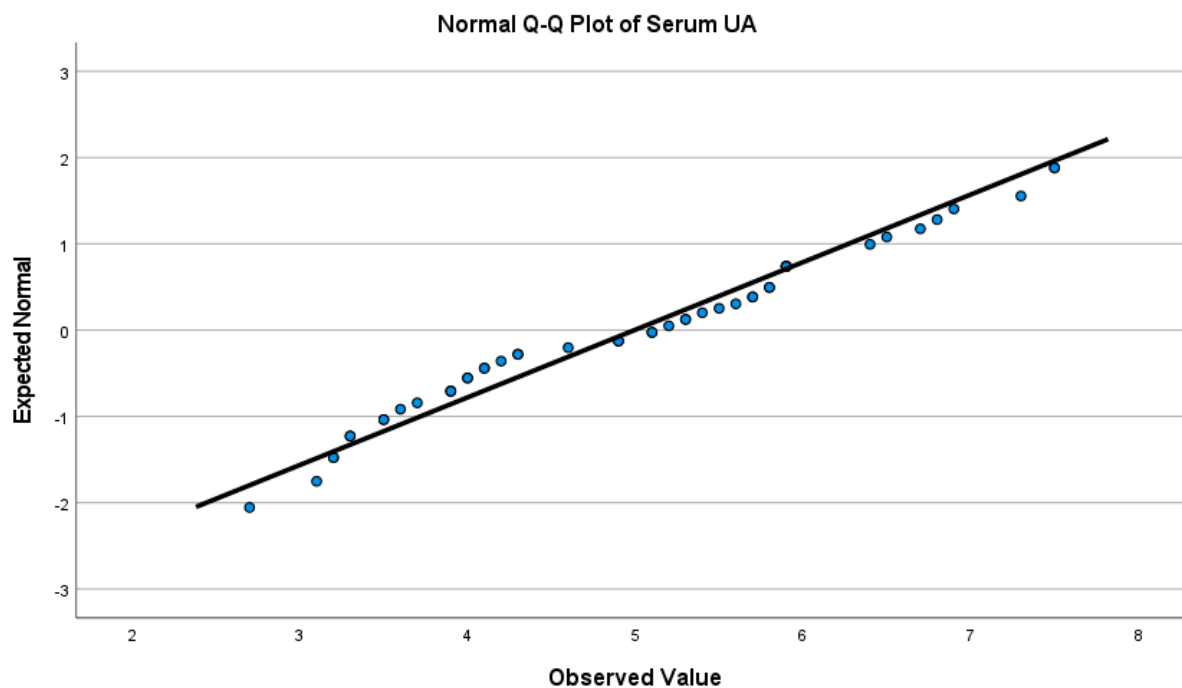

**Supplementary Figure S6.** Normal Q-Q plot showing normality of serum uric acid for the included Parkinson's disease patients, in SPSS® Subscription  
(UA = uric acid)

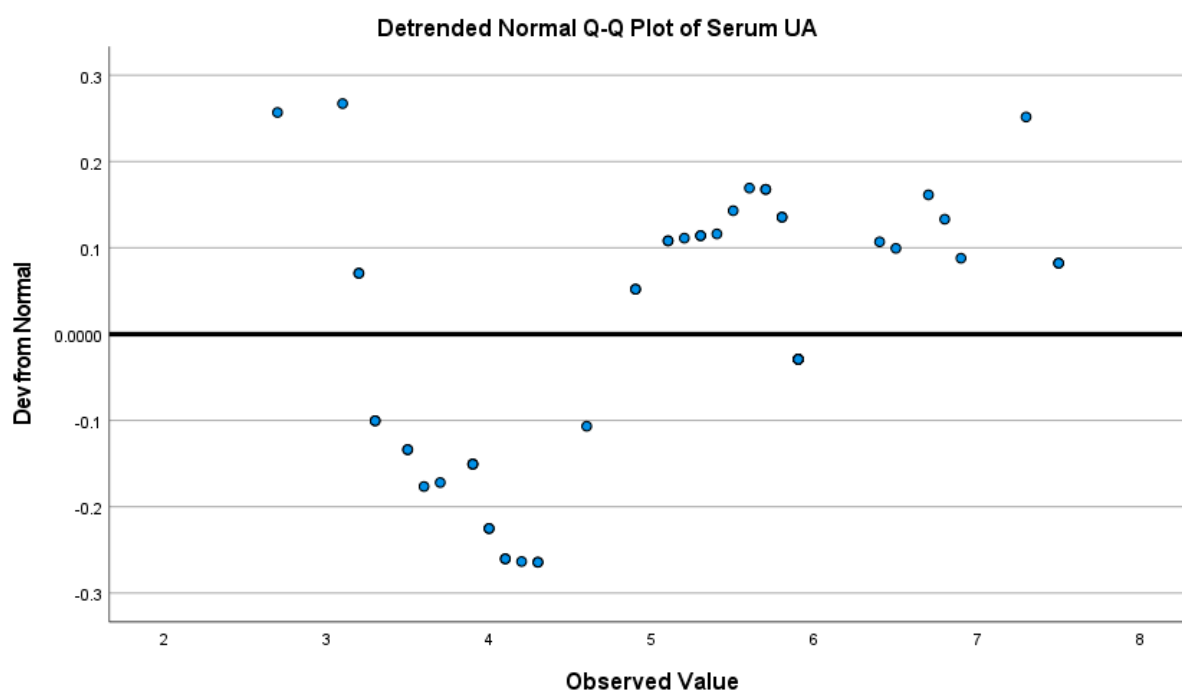

**Supplementary Figure S7.** Detrended normal Q-Q plot showing normality of serum uric acid for the included Parkinson's disease patients, in SPSS® Subscription  
(UA = uric acid)

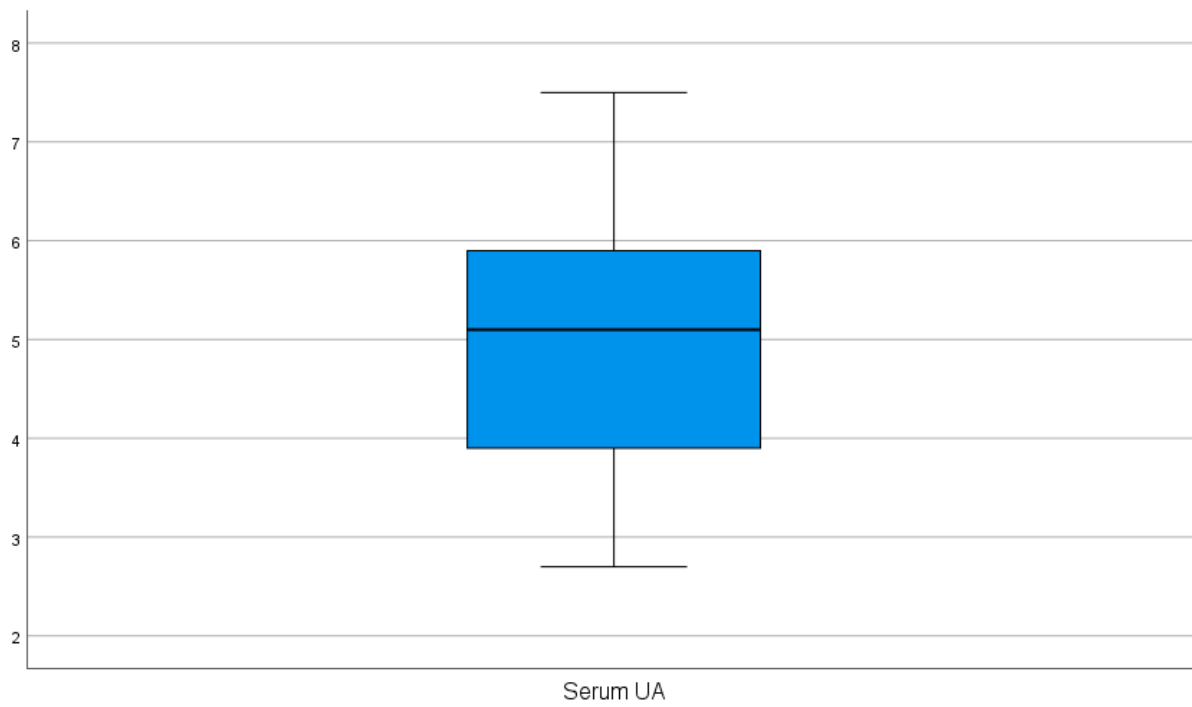

**Supplementary Figure S8.** Boxplot showing normality of age for the included Parkinson's disease patients, in SPSS® Subscription  
(UA = uric acid)

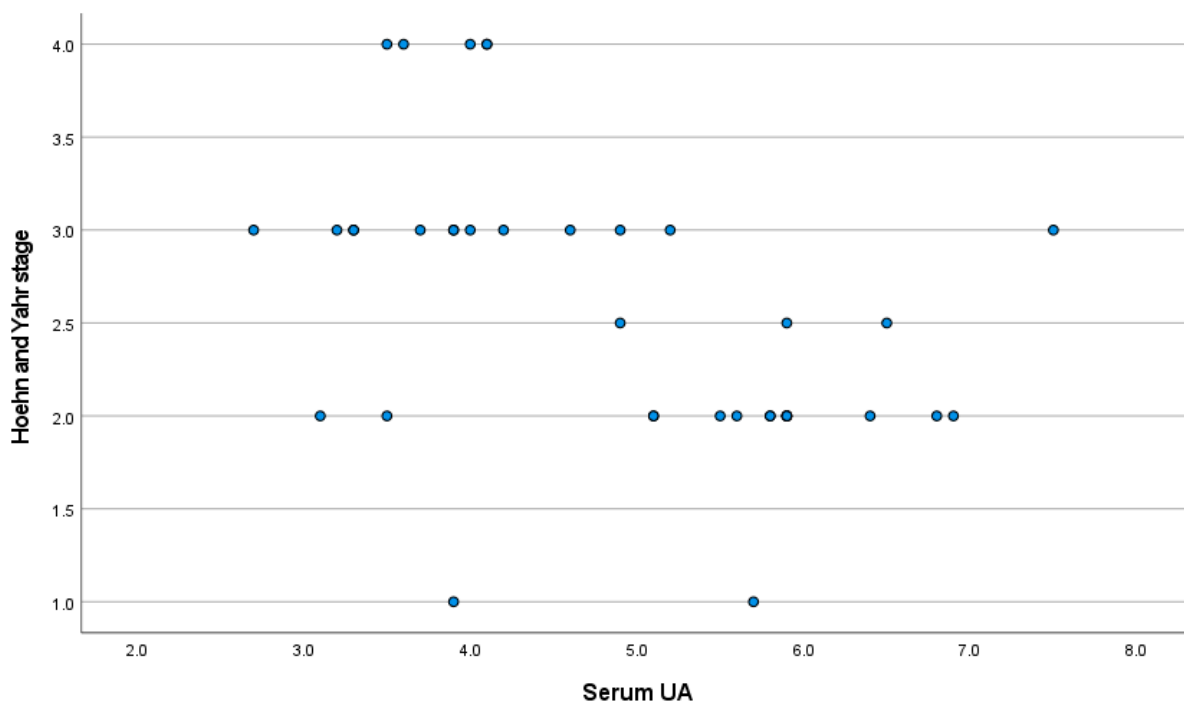

**Supplementary Figure S9.** Spearman graph showing correlation between lower level of serum uric acid and the Hoehn and Yahr stage.  
(UA = uric acid)

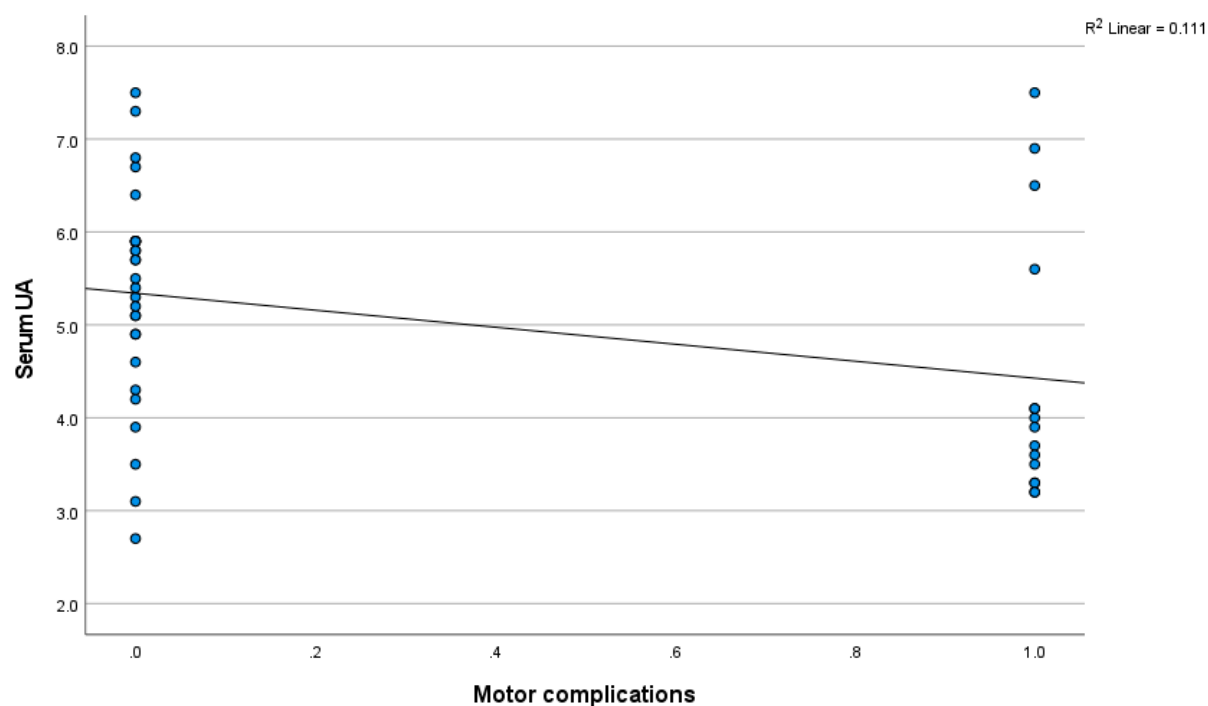

**Supplementary Figure S10.** Point-biserial correlation graph showing association between lower level of serum uric acid and presence of motor complications.  
(UA = uric acid)

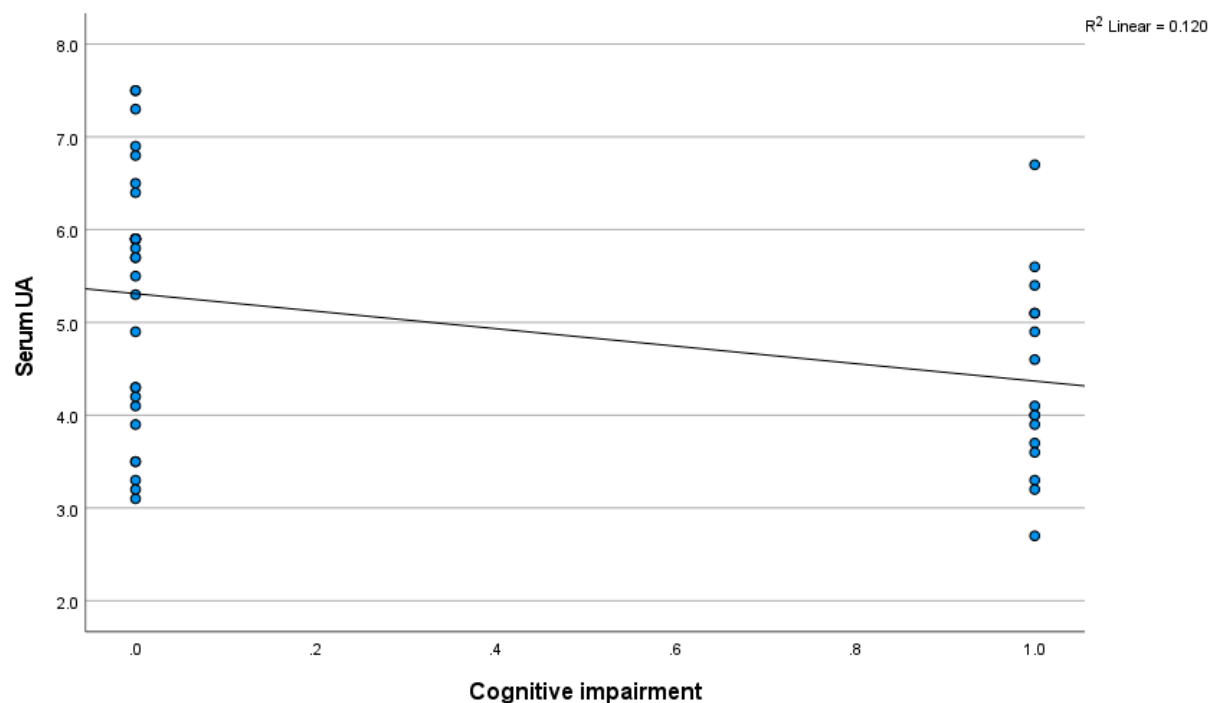

**Supplementary Figure S11.** Point-biserial correlation graph showing association between lower level of serum uric acid and presence of cognitive impairment.  
(UA = uric acid)
